# Supplementary material for: Simplified Iohexol-Based Method for Measurement of Glomerular Filtration Rate in Goats and Pigs
Source: MDPI journal article supplement (doi:10.3390/biology10060461), 2021-05-23
Supplement: s1 [file s1]

## Supplemental Figure

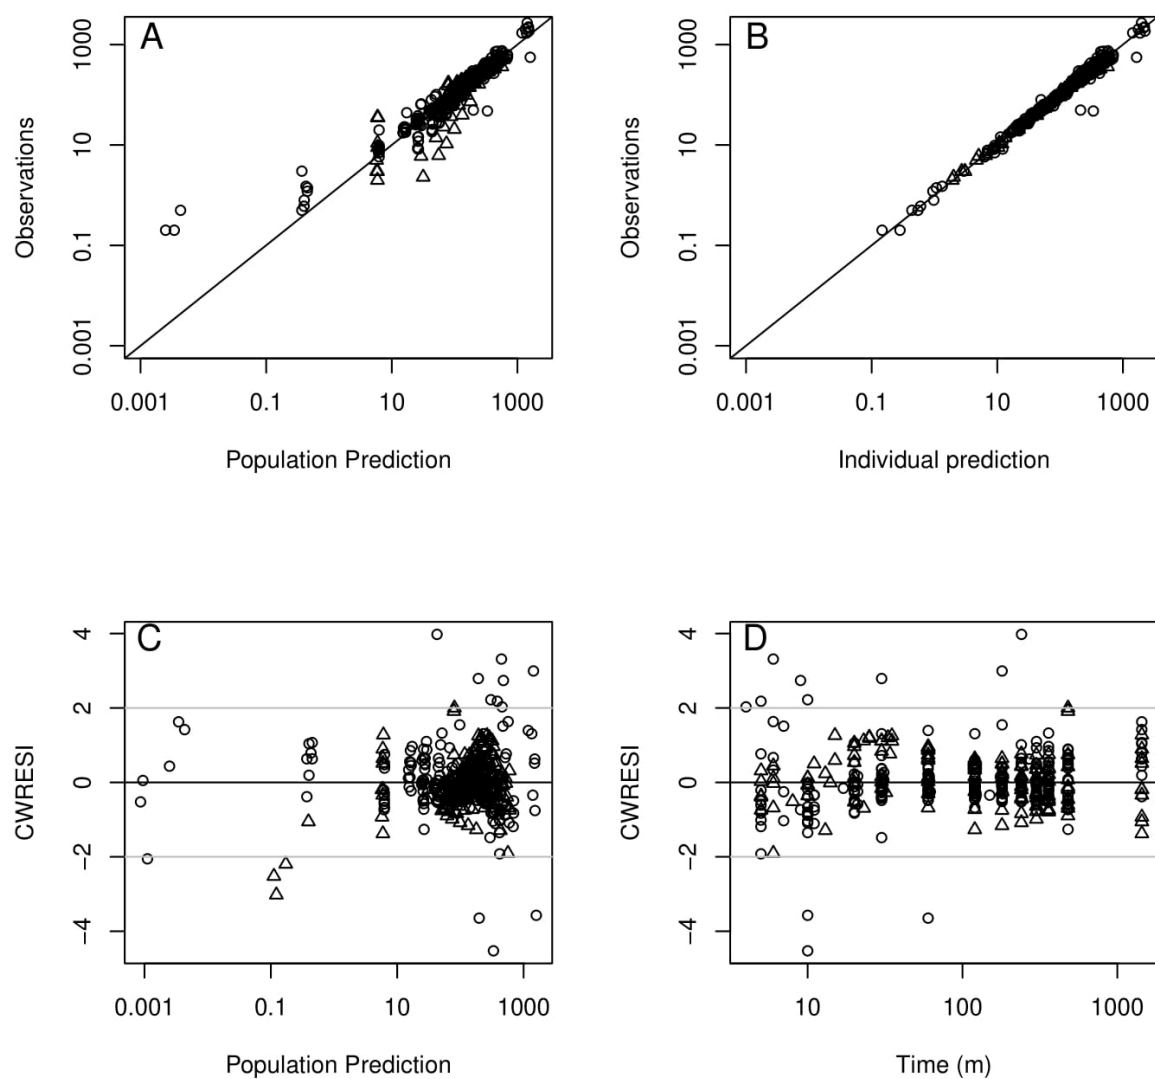

Figure S1. Goodness-of-fit plots population PK model; observed plasma iohexol concentration versus population- (A) and individual (B) prediction (black line = line of unity) and the conditional weighted residuals with interaction (CWRESI) versus population prediction (C) and time (D) (grey line = [-2.2] interval). Goats (triangles), pigs (circles).

## Supplemental Table

Table S1. Population parameter estimates of the pharmacokinetic iohexol model

| Parameter                       | Estimate  | RSE (%)       |
|---------------------------------|-----------|---------------|
| CL <sub>healthy</sub> pig (L/h) | 2.92      | 9.69          |
| V1 (L)                          | 2.57      | 6.07          |
| Q2 (/h)                         | 0.136     | 4.56          |
| V2 (L)                          | 0.251     | 13.5          |
| Q3 (/h)                         | 8.48      | 9.84          |
| V3 (L)                          | 3.11      | 8.09          |
| CL <sub>CKD</sub> pig (L/h)     | 1.67      | 10.5          |
| SPEC (goat)                     | 0.568     | 12.1          |
|                                 | CV (%)    | shrinkage (%) |
| $\omega^2$ IOV CL               | 32.9      | 22-44         |
| $\omega^2$ IIV V2               | 160       | 22.1          |
| $\sigma^2$ prop error           | 0.036     | 4.53          |
| $\sigma^2$ add error            | 0.000001* | 5.67          |

\*Fixed value, RSE: relative standard error, CV; coefficient of variation, CL<sub>healthy</sub>; iohexol plasma clearance in animals with normal kidney function, CL<sub>CKD</sub>; iohexol plasma clearance in animals with chronic kidney disease, SPEC; multiplication factor for covariate goat on CL<sub>healthy</sub> and CL<sub>CKD</sub> pig, IOV; interoccasion variability, IIV; interindividual variability, V<sub>x</sub>; volume of distribution of compartment x, Q<sub>y</sub>; intercompartmental clearance of compartment y.
